# Supplementary material for: Metagenomic Sequencing of Positive Blood Culture Fluid for Accurate Bacterial and Fungal Species Identification: A Pilot Study
Source: MDPI journal article supplement (doi:10.3390/microorganisms11051259), 2023-05-10
Supplement: s1 [file s1]

**Supplemental Table S1. Detailed Conventional Microbiological Results.**

| UCLA ID # | Final ID By Conventional Methods                        | Blood Culture Stain Results             | MALDI-TOF Performed? | MALDI-TOF ID                           | Other Micro Results or Morphological Description       |
|-----------|---------------------------------------------------------|-----------------------------------------|----------------------|----------------------------------------|--------------------------------------------------------|
| UCLA_467  | <i>Staphylococcus epidermidis</i>                       | Gram positive cocci in clusters         | Yes                  | <i>S. epidermidis</i>                  | Coagulase tube test negative                           |
| UCLA_468  | <i>Staphylococcus epidermidis</i>                       | Gram positive cocci in clusters         | Yes                  | <i>S. epidermidis</i>                  | Coagulase tube test negative                           |
| UCLA_469  | <i>Staphylococcus epidermidis</i>                       | Gram positive cocci in clusters         | Yes                  | <i>S. epidermidis</i>                  | Coagulase tube test negative                           |
| UCLA_470  | <i>Staphylococcus epidermidis</i>                       | Gram positive cocci in clusters         | Yes                  | <i>S. epidermidis</i>                  | Coagulase tube test negative                           |
| UCLA_471  | <i>Staphylococcus epidermidis</i>                       | Gram positive cocci in clusters         | Yes                  | <i>S. epidermidis</i>                  | Coagulase tube test negative                           |
| UCLA_472  | <i>Staphylococcus epidermidis</i>                       | Gram positive cocci in clusters         | Yes                  | <i>S. epidermidis</i>                  | Coagulase tube test negative                           |
| UCLA_473  | <i>Staphylococcus epidermidis</i>                       | Gram positive cocci in clusters         | Yes                  | <i>S. epidermidis</i>                  | Coagulase tube test negative                           |
| UCLA_478  | <i>Slackia exigua</i>                                   | Gram positive coccobacilli              | Yes                  | <i>Slackia exigua</i>                  | Anaerobic growth                                       |
| UCLA_496  | <i>Candida tropicalis</i>                               | Yeast                                   | Yes                  | <i>Candida tropicalis</i>              |                                                        |
| UCLA_497  | <i>Candida glabrata</i>                                 | Yeast                                   | Yes                  | <i>Candida glabrata</i>                |                                                        |
| UCLA_498  | <i>Fusarium proliferatum</i>                            | Fungal element                          | Yes                  | <i>Fusarium proliferatum</i>           |                                                        |
| UCLA_499  | <i>Desulfovibrio</i> spp.                               | Gram negative rod                       | Yes                  | <i>Desulvibrio</i> spp.                | Anaerobic growth                                       |
| UCLA_500  | <i>Candida lusitanae</i>                                | Yeast                                   | Yes                  | <i>Candida lusitanae</i>               |                                                        |
| UCLA_501  | <i>Bacteroides dorei</i>                                | Gram negative rod                       | Yes                  | <i>Bacteroides dorei</i>               | Anaerobic growth                                       |
| UCLA_502  | <i>Candida albicans</i>                                 | Yeast                                   | Yes                  | <i>Candida albicans</i>                |                                                        |
| UCLA_503  | <i>Bacteroides thetaiotaomicron</i>                     | Gram negative rod                       | Yes                  | <i>Bacteroides thetaiotaomicron</i>    | Anaerobic growth                                       |
| UCLA_505  | <i>Yellow pigmented rapid growing Mycobacterium</i> spp | Gram positive beaded rod; AFB positive  | Yes                  | No ID                                  | Yellow pigmented rapid grower                          |
| UCLA_510  | <i>Proteus mirabilis</i>                                | Gram negative Rod                       | Yes                  | <i>Proteus mirabilis</i>               |                                                        |
| UCLA_517  | <i>Escherichia coli</i>                                 | Gram negative Rod                       | Yes                  | <i>E. coli</i>                         | Lactose positive                                       |
| UCLA_518  | <i>Staphylococcus lugdunensis</i>                       | Gram positive cocci in clusters         | Yes                  | <i>Staphylococcus lugdunensis</i>      |                                                        |
| UCLA_519  | <i>Streptococcus anginosus</i> group                    | Gram positive cocci in chains           | Yes                  | <i>Streptococcus intermedius</i>       |                                                        |
| UCLA_520  | <i>Clostridium butyricum</i>                            | Gram positive cocci in chains           | Yes                  | <i>Clostridium butyricum</i>           |                                                        |
| UCLA_524  | <i>Mycobacterium avium</i> complex                      | Gram positive beaded rod; AFB positive  | No                   | NA                                     | MAC DNA probe positive                                 |
| UCLA_558  | <i>Staphylococcus epidermidis</i>                       | Gram positive cocci in clusters         | Yes                  | <i>S. epidermidis</i>                  | Coagulase tube test negative                           |
| UCLA_559  | <i>Enterococcus faecium</i>                             | Gram-positive cocci in pairs and chains | Yes                  | <i>Enterococcus faecium</i>            |                                                        |
| UCLA_560  | <i>Fusobacterium nucleatum</i>                          | Gram-negative rod                       | Yes                  | <i>Fusobacterium nucleatum</i>         |                                                        |
| UCLA_561  | <i>Staphylococcus haemolyticus</i>                      | Gram-positive cocci in clusters         | Yes                  | <i>Staphylococcus haemolyticus</i>     |                                                        |
| UCLA_562  | <i>Staphylococcus epidermidis</i>                       | Gram positive cocci in clusters         | Yes                  | <i>S. epidermidis</i>                  | Coagulase tube test negative                           |
| UCLA_596  | <i>Aspergillus flavus-oryzae</i> group                  | Fungal element                          | Yes                  | <i>Aspergillus flavus-oryzae</i> group | Fungus balls were seen inside the blood culture bottle |
| UCLA_1007 | <i>Mycobacterium avium</i> complex                      | Gram positive beaded rod; AFB positive  | No                   | NA                                     | MAC DNA probe positive                                 |
